# Supplementary material for: Electrosynthesis of Au nanocluster embedded conductive polymer films at soft interfaces using dithiafulvenyl-functionalized pyrene
Source: Royal Society of Chemistry journal article supplement (doi:10.1039/d2nr06519c), 2023-01-01
Supplement: d2nr06519c1.pdf [file d2nr06519c1.pdf]

## **Supplementary Information for: Electrosynthesis of Au nanocluster embedded conductive polymer films at soft interfaces using dithiafulvenyl-functionalized pyrene**

Reza Moshrefi, Katelyn Ryan, Evan P. Connors, Joshua C. Walsh, Erika Merschrod, Graham J. Bodwell, and Talia Jane Stockmann\*

Memorial University of Newfoundland, Core Science Facility, 45 Arctic Ave, St. John's, NL, Canada, A1C 5S7

Email: [tstockmann@mun.ca](mailto:tstockmann@mun.ca)

### **Table of Contents**

|                                                                                                                                                                         |   |
|-------------------------------------------------------------------------------------------------------------------------------------------------------------------------|---|
| Supplementary Information for: Electrosynthesis of Au nanocluster embedded conductive polymer films at soft interfaces using dithiafulvenyl-functionalized pyrene ..... | 1 |
| Modified Pipette Holder: .....                                                                                                                                          | 2 |
| Micropipette fabrication.....                                                                                                                                           | 2 |
| References.....                                                                                                                                                         | 3 |

## Modified Pipette Holder:

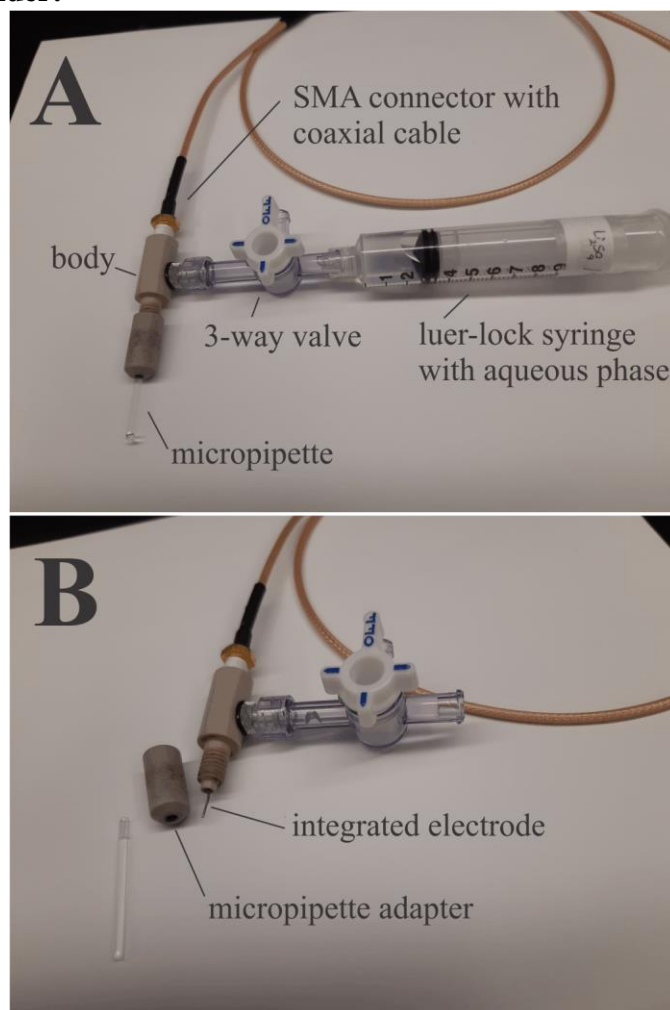

**Figure S1:** Photographs of the assembled (A) and partially disassembled (B) micropipette holder with integrated working electrode connected to an SMA adapter and shielded coaxial cable which is connected to the head-stage (not pictured) of the HEKA potentiostat. The body of the holder was fabricated from PEEK, *i.e.*, poly(ether ether ketone), by Memorial University's Technical Services Department.

### Micropipette fabrication

Micropipettes were fabricated from a single borosilicate glass capillary (1.16 mm/2.0mm internal/external diameter, Sutter Instruments). The capillary was installed inside of an electric puller (PC-100-CA, Narishige, Japan) with the heating coil situated towards its middle and pulled by a weight affixed to the bottom end. In this way, two tapered tips were generated. Next, a hand torch was used to seal the tapered ends of the capillaries. A ~1.5 cm long segment of Pt-wire (25  $\mu\text{m}$  in diameter, Goodfellow Inc.) fed into the open end of the capillary and pushed down into the tapered end using a ~1 mm diameter copper wire. A vacuum line was attached to the open end of the capillary which was held inside the electric puller. The capillary was placed under vacuum for ~5 min, and then the Pt-wire was annealed in place using the electric puller and suspending the tapered end inside the heating coil. Next, by using increasingly fine grinding/polishing pads, including 12, 4 and 3  $\mu\text{m}$  FibrMet aluminum oxide Abrasive discs (Buehler), a smooth cross-

section of the capillary was achieved and confirmed *via* visual inspection using an optical microscope (AmScope). Polishing was also used to achieve an  $R_g > 50$  ( $R_g = r_g/a$ ), where  $r_g$  is the outer glass radius and  $a$  is the Pt disc radius. The Pt-wire was then etched *via* immersion in aqua regia (3:1 ratio of HCl:HNO<sub>3</sub>) for up to 7 days generating a 25 μm diameter microchannel.<sup>1-3</sup>

## References

1. R. Moshrefi, A. Suryawanshi and T. J. Stockmann, *Electrochem. Commun.*, 2021, **122**, 106894.
2. Q. Jiang, H. E. Reader and T. J. Stockmann, *ChemElectroChem*, 2021, **8**, 1580-1587.
3. R. Moshrefi, E. P. Connors, E. Merschrod and T. J. Stockmann, *Electrochim. Acta*, 2022, **426**, 140749.
